# Supplementary material for: Trans-Catena-Poly[[(Bis-(μ-N,N’-Bis[(Pyridin-3-yl)Methyl]Ethanediamide))-Diaqua-Cadmium(II)] Bis(Nitrate) Tetrahydrate)]
Source: Preprints.org preprint supplement (doi:10.20944/preprints202406.0709.v1), 2024-06-11
Supplement: Supplementary file 1 [file supplementary]

## SUPPLEMENTARY MATERIALS

*Trans-catena-poly[[bis-(μ-N,N'-bis[(pyridin-3-yl)methyl]ethanediamide))diaqua-cadmium(II)] bis(nitrate) tetrahydrate]*

**Anna Caria <sup>1</sup>, Enrico Podda <sup>1,2</sup>, M. Carla Aragoni <sup>1</sup>, Riccardo Lai <sup>1</sup>, Anna Pintus <sup>1</sup>, and  
Massimiliano Arca <sup>1\*</sup>**

<sup>1</sup> Dipartimento di Scienze Chimiche e Geologiche, Università degli Studi di Cagliari, S.S. 554 bivio Sestu, Monserrato, 09042 Cagliari, Italy

<sup>2</sup> Centro Servizi di Ateneo per la Ricerca (CeSAR), Università degli Studi di Cagliari, S.S. 554 bivio Sestu, Monserrato, 09042 Cagliari, Italy

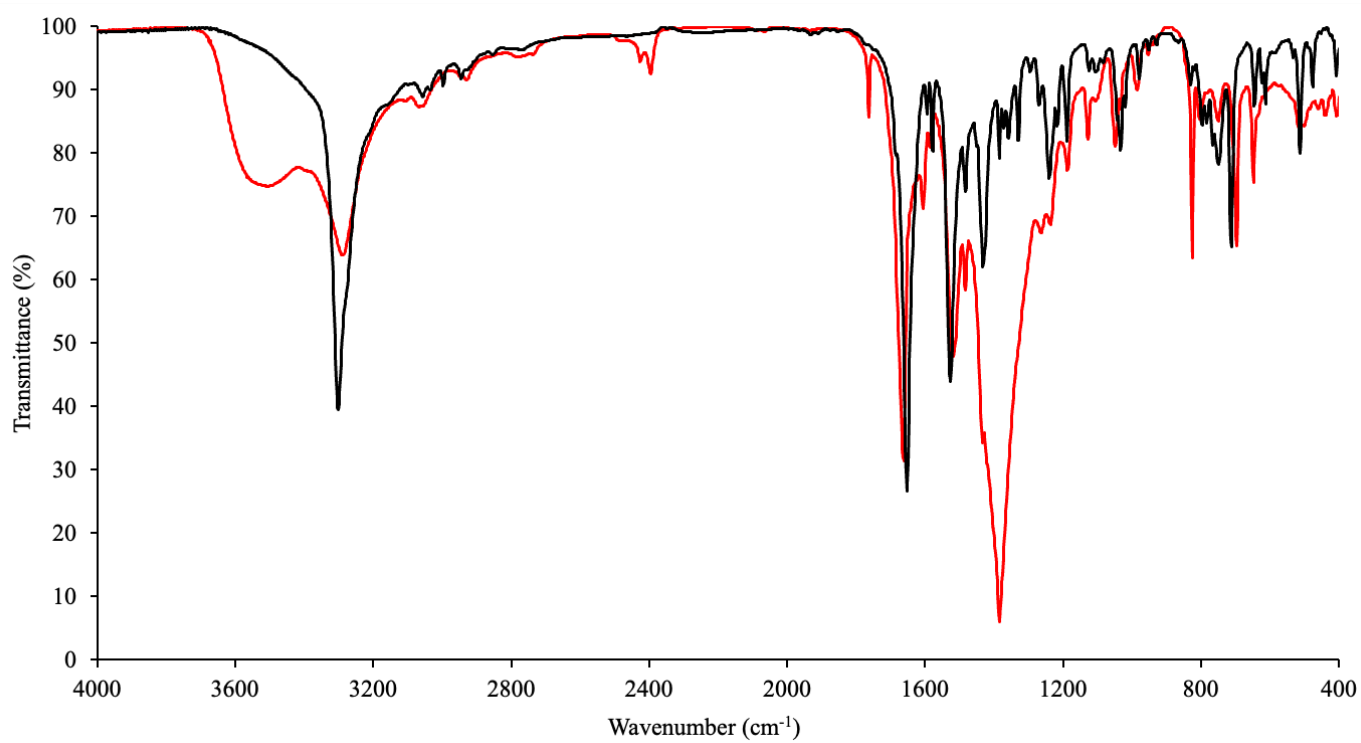

**Figure S1.** FT-IR spectrum (400–4000 cm<sup>-1</sup>) recorded at r.t. for L (black) and compound 1 (red; KBr pellet).

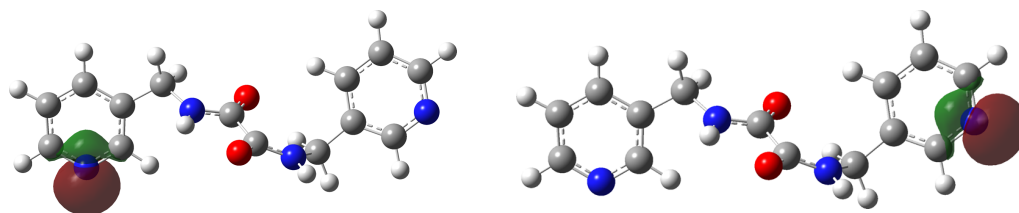

**Figure S2.** Natural bonding orbitals (NBOs) localized on the pyridine N-atoms of the donor **L**.

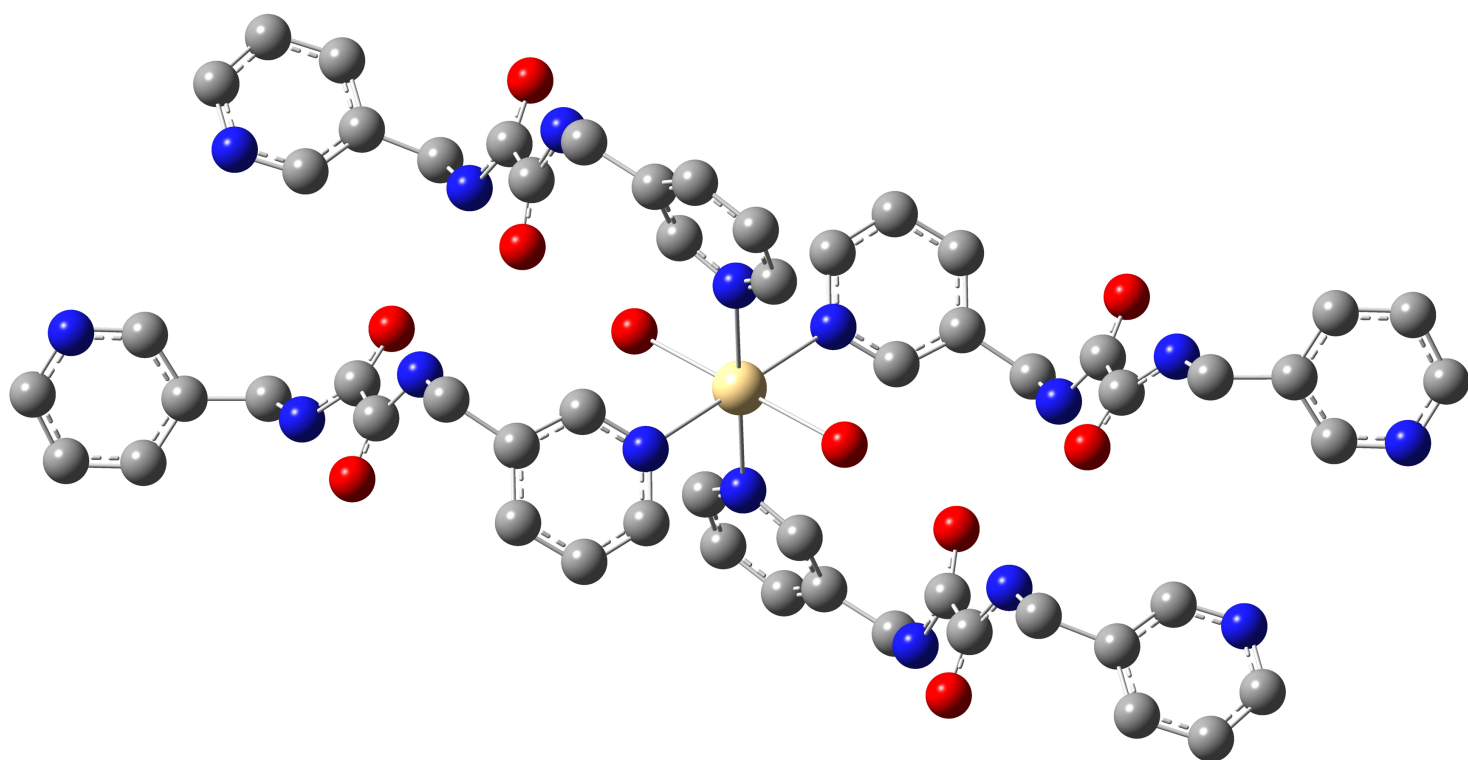

**Figure S3.** Model cation  $[Cd(L)_4(OH_2)_2]^{2+}$  optimized at hybrid-DFT level (mPW1PW/def2SVP). Cd, pale yellow; C, gray; N, blue; O, red. Hydrogen atoms were omitted for clarity.

**Table S1.** Crystal data and refinement parameters for compound **1**.

|                                   |                                                                   |
|-----------------------------------|-------------------------------------------------------------------|
| Formula                           | C <sub>28</sub> H <sub>40</sub> CdN <sub>10</sub> O <sub>16</sub> |
| $\rho_{calc.}/\text{g cm}^{-3}$   | 1.621                                                             |
| $\mu/\text{mm}^{-1}$              | 0.688                                                             |
| Formula Weight                    | 885.10                                                            |
| Colour                            | colourless                                                        |
| Shape                             | block-shaped                                                      |
| Size/mm <sup>3</sup>              | 0.20×0.18×0.10                                                    |
| <i>T</i> /K                       | 100(2)                                                            |
| Crystal System                    | triclinic                                                         |
| Space Group                       | <i>P</i> $\bar{1}$                                                |
| <i>a</i> /Å                       | 9.1489(9)                                                         |
| <i>b</i> /Å                       | 9.2546(9)                                                         |
| <i>c</i> /Å                       | 11.6226(12)                                                       |
| $\alpha/^\circ$                   | 91.023(4)                                                         |
| $\beta/^\circ$                    | 112.441(4)                                                        |
| $\gamma/^\circ$                   | 93.497(4)                                                         |
| <i>V</i> /Å <sup>3</sup>          | 906.96(16)                                                        |
| <i>Z</i>                          | 1                                                                 |
| <i>Z'</i>                         | 0.5                                                               |
| Wavelength/Å                      | 0.71073                                                           |
| Radiation type                    | MoK $\alpha$                                                      |
| $\theta_{min}/^\circ$             | 2.433                                                             |
| $\theta_{max}/^\circ$             | 28.699                                                            |
| Measured Refl's.                  | 44270                                                             |
| Indep't Refl's                    | 4674                                                              |
| Refl's $I \geq 2\sigma(I)$        | 4618                                                              |
| <i>R</i> <sub>int</sub>           | 0.0390                                                            |
| Parameters                        | 276                                                               |
| Restraints                        | 0                                                                 |
| Largest Peak                      | 0.425                                                             |
| Deepest Hole                      | -0.266                                                            |
| GooF                              | 1.065                                                             |
| <i>wR</i> <sub>2</sub> (all data) | 0.0425                                                            |
| <i>wR</i> <sub>2</sub>            | 0.0424                                                            |
| <i>R</i> <sub>1</sub> (all data)  | 0.0170                                                            |
| <i>R</i> <sub>1</sub>             | 0.0167                                                            |

**Table S2.** Bond lengths (Å) for compound **1**. Atom labelling scheme as in Figure 1.

| Atom | Atom              | Length/Å   |
|------|-------------------|------------|
| Cd1  | O8 <sup>ii</sup>  | 2.2991(9)  |
| Cd1  | O8                | 2.2991(9)  |
| Cd1  | N1                | 2.3365(10) |
| Cd1  | N1 <sup>ii</sup>  | 2.3365(10) |
| Cd1  | N4 <sup>iii</sup> | 2.3766(10) |
| Cd1  | N4 <sup>i</sup>   | 2.3766(10) |
| O1   | C7                | 1.2286(14) |
| O2   | C8                | 1.2325(14) |
| N1   | C1                | 1.3439(15) |
| N1   | C5                | 1.3427(14) |
| N2   | C6                | 1.4507(15) |
| N2   | C7                | 1.3254(14) |
| N3   | C8                | 1.3303(14) |
| N3   | C9                | 1.4514(14) |
| N4   | C11               | 1.3430(14) |
| N4   | C12               | 1.3457(14) |
| C1   | C2                | 1.3801(17) |
| C2   | C3                | 1.3860(19) |
| C3   | C4                | 1.3810(17) |
| C4   | C5                | 1.3906(15) |
| C4   | C6                | 1.5126(16) |
| C7   | C8                | 1.5334(16) |
| C9   | C10               | 1.5094(15) |
| C10  | C11               | 1.3877(15) |
| C10  | C14               | 1.3912(15) |
| C12  | C13               | 1.3838(16) |
| C13  | C14               | 1.3888(16) |
| O3   | N5                | 1.2574(12) |
| O4   | N5                | 1.2449(13) |
| O5   | N5                | 1.2574(13) |

Symmetry codes: <sup>i</sup> = +*x*, +*y*, 1+*z*; <sup>ii</sup> = 1−*x*, 1−*y*, 2−*z*; <sup>iii</sup> = 1−*x*, 1−*y*, 1−*z*.

**Table S3.** Bond angles (°) for compound **1**. Atom labelling scheme as in Figure 1.

| Atom              | Atom | Atom              | Angle/°    |
|-------------------|------|-------------------|------------|
| O8 <sup>ii</sup>  | Cd1  | O8                | 180.0      |
| O8                | Cd1  | N1 <sup>ii</sup>  | 88.99(3)   |
| O8 <sup>ii</sup>  | Cd1  | N1                | 89.00(3)   |
| O8                | Cd1  | N1                | 91.01(3)   |
| O8 <sup>ii</sup>  | Cd1  | N1 <sup>ii</sup>  | 91.00(3)   |
| O8                | Cd1  | N4 <sup>iii</sup> | 91.16(3)   |
| O8 <sup>ii</sup>  | Cd1  | N4 <sup>i</sup>   | 91.16(3)   |
| O8 <sup>ii</sup>  | Cd1  | N4 <sup>iii</sup> | 88.84(3)   |
| O8                | Cd1  | N4 <sup>i</sup>   | 88.84(3)   |
| N1                | Cd1  | N1 <sup>ii</sup>  | 180.00(4)  |
| N1 <sup>ii</sup>  | Cd1  | N4 <sup>iii</sup> | 90.28(3)   |
| N1                | Cd1  | N4 <sup>i</sup>   | 90.28(3)   |
| N1                | Cd1  | N4 <sup>iii</sup> | 89.72(3)   |
| N1 <sup>ii</sup>  | Cd1  | N4 <sup>i</sup>   | 89.72(3)   |
| N4 <sup>iii</sup> | Cd1  | N4 <sup>i</sup>   | 180.0      |
| C1                | N1   | Cd1               | 119.59(8)  |
| C5                | N1   | Cd1               | 121.99(7)  |
| C5                | N1   | C1                | 118.26(10) |
| C7                | N2   | C6                | 121.41(10) |
| C8                | N3   | C9                | 122.77(10) |
| C11               | N4   | Cd1 <sup>iv</sup> | 116.79(7)  |
| C11               | N4   | C12               | 117.79(10) |
| C12               | N4   | Cd1 <sup>iv</sup> | 124.13(7)  |
| N1                | C1   | C2                | 122.16(11) |
| C1                | C2   | C3                | 119.02(11) |
| C4                | C3   | C2                | 119.69(11) |
| C3                | C4   | C5                | 117.71(11) |
| C3                | C4   | C6                | 121.97(10) |
| C5                | C4   | C6                | 120.30(10) |
| N1                | C5   | C4                | 123.15(10) |
| N2                | C6   | C4                | 112.26(9)  |
| O1                | C7   | N2                | 125.40(11) |
| O1                | C7   | C8                | 121.16(10) |
| N2                | C7   | C8                | 113.43(10) |
| O2                | C8   | N3                | 125.03(11) |
| O2                | C8   | C7                | 121.72(10) |
| N3                | C8   | C7                | 113.25(10) |
| N3                | C9   | C10               | 114.26(9)  |
| C11               | C10  | C9                | 121.62(10) |
| C11               | C10  | C14               | 117.63(10) |
| C14               | C10  | C9                | 120.68(10) |
| N4                | C11  | C10               | 123.71(10) |
| N4                | C12  | C13               | 122.53(10) |
| C12               | C13  | C14               | 118.94(10) |
| C13               | C14  | C10               | 119.38(10) |
| O4                | N5   | O3                | 120.10(10) |
| O4                | N5   | O5                | 119.85(9)  |
| O5                | N5   | O3                | 120.04(10) |

Symmetry codes: <sup>i</sup> = +x, +y, 1+z; <sup>ii</sup> = 1-x, 1-y, 2-z; <sup>iii</sup> = 1-x, 1-y, 1-z, <sup>iv</sup> = +x, +y, -1+z.

**Table S4.** Torsion angles (°) for compound **1**. Atom labelling scheme as in Figure 1.

| Atom              | Atom | Atom | Atom | Angle/°     |
|-------------------|------|------|------|-------------|
| Cd1               | N1   | C1   | C2   | 175.24(9)   |
| Cd1               | N1   | C5   | C4   | -174.38(8)  |
| Cd1 <sup>iv</sup> | N4   | C11  | C10  | -165.69(8)  |
| Cd1 <sup>iv</sup> | N4   | C12  | C13  | 165.47(8)   |
| O1                | C7   | C8   | O2   | -174.70(10) |
| O1                | C7   | C8   | N3   | 5.85(15)    |
| N1                | C1   | C2   | C3   | -0.53(19)   |
| N2                | C7   | C8   | O2   | 4.57(15)    |
| N2                | C7   | C8   | N3   | -174.88(9)  |
| N3                | C9   | C10  | C11  | 33.78(15)   |
| N3                | C9   | C10  | C14  | -149.37(10) |
| N4                | C12  | C13  | C14  | -0.14(17)   |
| C1                | N1   | C5   | C4   | 0.98(16)    |
| C1                | C2   | C3   | C4   | 0.58(19)    |
| C2                | C3   | C4   | C5   | 0.10(17)    |
| C2                | C3   | C4   | C6   | -178.29(11) |
| C3                | C4   | C5   | N1   | -0.92(17)   |
| C3                | C4   | C6   | N2   | -131.29(12) |
| C5                | N1   | C1   | C2   | -0.24(17)   |
| C5                | C4   | C6   | N2   | 50.35(14)   |
| C6                | N2   | C7   | O1   | 0.24(17)    |
| C6                | N2   | C7   | C8   | -178.99(9)  |
| C6                | C4   | C5   | N1   | 177.50(10)  |
| C7                | N2   | C6   | C4   | 78.86(13)   |
| C8                | N3   | C9   | C10  | -86.13(13)  |
| C9                | N3   | C8   | O2   | 5.02(17)    |
| C9                | N3   | C8   | C7   | -175.56(9)  |
| C9                | C10  | C11  | N4   | 175.60(10)  |
| C9                | C10  | C14  | C13  | -176.96(10) |
| C11               | N4   | C12  | C13  | -1.10(16)   |
| C11               | C10  | C14  | C13  | 0.01(16)    |
| C12               | N4   | C11  | C10  | 1.87(16)    |
| C12               | C13  | C14  | C10  | 0.68(17)    |
| C14               | C10  | C11  | N4   | -1.34(17)   |

Symmetry code: <sup>iv</sup> = +x, +y, -1+z.



**Table S5.** Optimized geometry at DFT level (mPW1PW/def2SVP) for **L** in Cartesian coordinate format.

| Center<br>Number | Atomic<br>Number | Coordinates (Å) |           |           |
|------------------|------------------|-----------------|-----------|-----------|
|                  |                  | X               | Y         | Z         |
| 1                | 6                | 4.969078        | -0.790985 | 0.604069  |
| 2                | 6                | 3.678894        | -0.534996 | 0.130927  |
| 3                | 6                | 3.558676        | 0.279946  | -0.999324 |
| 4                | 6                | 4.711126        | 0.792594  | -1.583025 |
| 5                | 6                | 5.946114        | 0.472758  | -1.016226 |
| 6                | 1                | 5.106111        | -1.435957 | 1.481090  |
| 7                | 1                | 2.568613        | 0.488493  | -1.410216 |
| 8                | 1                | 4.659135        | 1.427563  | -2.468699 |
| 9                | 1                | 6.871238        | 0.863680  | -1.452857 |
| 10               | 7                | 6.077331        | -0.304701 | 0.053300  |
| 11               | 6                | 2.465814        | -1.105266 | 0.823956  |
| 12               | 1                | 1.771305        | -1.517935 | 0.086685  |
| 13               | 1                | 2.778476        | -1.920553 | 1.493780  |
| 14               | 7                | 1.750862        | -0.123252 | 1.624818  |
| 15               | 1                | 2.194445        | 0.166760  | 2.490908  |
| 16               | 6                | 0.574964        | 0.505404  | 1.432004  |
| 17               | 7                | -1.436007       | 0.779799  | 0.208793  |
| 18               | 1                | -1.629815       | 1.273781  | 1.076903  |
| 19               | 6                | -2.377716       | 0.767448  | -0.878332 |
| 20               | 1                | -1.922126       | 0.152274  | -1.670157 |
| 21               | 1                | -2.495917       | 1.781152  | -1.296427 |
| 22               | 6                | -3.733255       | 0.224693  | -0.498634 |
| 23               | 6                | -3.875054       | -0.854534 | 0.382514  |
| 24               | 6                | -4.902842       | 0.761303  | -1.039658 |
| 25               | 1                | -2.985040       | -1.298423 | 0.840992  |
| 26               | 6                | -6.130917       | 0.205199  | -0.696184 |
| 27               | 1                | -4.851861       | 1.611417  | -1.724756 |
| 28               | 6                | -6.146000       | -0.872304 | 0.187852  |
| 29               | 1                | -7.062512       | 0.602842  | -1.101007 |
| 30               | 1                | -7.094464       | -1.334214 | 0.480773  |
| 31               | 7                | -5.042675       | -1.390966 | 0.719234  |
| 32               | 6                | -0.197074       | 0.267386  | 0.115019  |
| 33               | 8                | 0.261935        | -0.283867 | -0.871958 |
| 34               | 8                | 0.096370        | 1.267932  | 2.256735  |

**Table S6.** Optimized geometry at DFT level (mPW1PW/def2SVP) the model cation  $[\text{Cd}(\text{L})_4(\text{OH}_2)_2]^{2+}$  in Cartesian coordinate format.

| Center<br>Number | Atomic<br>Number | Coordinates (Å) |           |           |
|------------------|------------------|-----------------|-----------|-----------|
|                  |                  | X               | Y         | Z         |
| 1                | 8                | -5.187736       | -4.518935 | 0.278367  |
| 2                | 8                | -4.199177       | -1.525422 | -1.243082 |
| 3                | 7                | -10.164486      | -2.093813 | 0.152065  |
| 4                | 7                | -5.929454       | -2.409139 | 0.759362  |
| 5                | 1                | -5.966850       | -1.442011 | 0.425624  |
| 6                | 7                | -3.832233       | -3.710135 | -1.796642 |
| 7                | 1                | -4.076215       | -4.641985 | -1.453509 |
| 8                | 7                | -0.090050       | -1.710405 | -1.641981 |
| 9                | 6                | -10.867141      | -3.178735 | 0.471650  |
| 10               | 1                | -11.903415      | -3.210771 | 0.122717  |
| 11               | 6                | -10.335785      | -4.234262 | 1.211633  |
| 12               | 1                | -10.946694      | -5.107648 | 1.442387  |
| 13               | 6                | -9.015979       | -4.146881 | 1.646853  |
| 14               | 1                | -8.570497       | -4.956438 | 2.229710  |
| 15               | 6                | -8.272676       | -3.010096 | 1.327958  |
| 16               | 6                | -8.906465       | -2.021588 | 0.568118  |
| 17               | 1                | -8.352066       | -1.120298 | 0.287401  |
| 18               | 6                | -6.852043       | -2.815191 | 1.806848  |
| 19               | 1                | -6.472700       | -3.749517 | 2.239014  |
| 20               | 1                | -6.823599       | -2.044636 | 2.591837  |
| 21               | 6                | -5.229344       | -3.317023 | 0.074908  |
| 22               | 6                | -4.377284       | -2.736995 | -1.068686 |
| 23               | 6                | -3.088928       | -3.539133 | -3.022861 |
| 24               | 1                | -3.107660       | -4.493383 | -3.564442 |
| 25               | 1                | -3.621889       | -2.810466 | -3.656932 |
| 26               | 6                | -1.662893       | -3.058986 | -2.867784 |
| 27               | 6                | -1.281024       | -2.303535 | -1.763623 |
| 28               | 1                | -1.975927       | -2.137569 | -0.946107 |
| 29               | 6                | 0.824973        | -1.902645 | -2.598128 |
| 30               | 1                | 1.790089        | -1.411911 | -2.458909 |
| 31               | 6                | 0.562480        | -2.689734 | -3.714666 |
| 32               | 1                | 1.335567        | -2.842160 | -4.467942 |
| 33               | 6                | -0.700923       | -3.257246 | -3.861960 |
| 34               | 1                | -0.932925       | -3.850092 | -4.749803 |
| 35               | 8                | -6.100317       | 3.244661  | -1.772956 |
| 36               | 8                | -6.564812       | 0.386786  | 0.191437  |
| 37               | 7                | -1.038027       | 1.505716  | -1.463960 |
| 38               | 7                | -5.261589       | 1.151055  | -2.070939 |
| 39               | 1                | -5.226762       | 0.212468  | -1.677458 |
| 40               | 7                | -7.763505       | 2.336852  | 0.138332  |
| 41               | 1                | -7.801689       | 3.218942  | -0.368513 |
| 42               | 7                | -12.180660      | 1.791998  | -0.309687 |
| 43               | 6                | -0.680213       | 2.796291  | -1.532203 |
| 44               | 1                | 0.258349        | 3.076543  | -1.050707 |
| 45               | 6                | -1.462647       | 3.750632  | -2.167472 |

|    |    |            |           |           |
|----|----|------------|-----------|-----------|
| 46 | 1  | -1.132645  | 4.789052  | -2.202436 |
| 47 | 6  | -2.678295  | 3.362395  | -2.728575 |
| 48 | 1  | -3.335394  | 4.097608  | -3.196975 |
| 49 | 6  | -3.057987  | 2.021550  | -2.668324 |
| 50 | 6  | -2.187230  | 1.134392  | -2.035995 |
| 51 | 1  | -2.457397  | 0.077700  | -1.973808 |
| 52 | 6  | -4.396569  | 1.519169  | -3.164101 |
| 53 | 1  | -4.892567  | 2.303107  | -3.750925 |
| 54 | 1  | -4.258850  | 0.645444  | -3.815273 |
| 55 | 6  | -6.021710  | 2.073220  | -1.453471 |
| 56 | 6  | -6.820059  | 1.497658  | -0.272539 |
| 57 | 6  | -8.730517  | 2.074822  | 1.191988  |
| 58 | 1  | -8.449804  | 2.646494  | 2.091178  |
| 59 | 1  | -8.651798  | 1.009768  | 1.442443  |
| 60 | 6  | -10.130879 | 2.435584  | 0.768983  |
| 61 | 6  | -10.954368 | 1.508648  | 0.114431  |
| 62 | 1  | -10.613685 | 0.479343  | -0.057463 |
| 63 | 6  | -12.654043 | 3.016986  | -0.100971 |
| 64 | 1  | -13.666839 | 3.218049  | -0.464345 |
| 65 | 6  | -11.930455 | 4.015624  | 0.550539  |
| 66 | 1  | -12.367497 | 5.001694  | 0.711592  |
| 67 | 6  | -10.646637 | 3.714826  | 0.992222  |
| 68 | 1  | -10.053071 | 4.468958  | 1.516200  |
| 69 | 48 | 0.000009   | 0.000025  | -0.000001 |
| 70 | 8  | 6.100253   | -3.244687 | 1.772930  |
| 71 | 8  | 6.564824   | -0.386839 | -0.191485 |
| 72 | 8  | -2.329693  | -0.585008 | 0.735822  |
| 73 | 1  | -2.559268  | -1.056188 | 1.545346  |
| 74 | 1  | -3.109608  | -0.686590 | 0.153247  |
| 75 | 7  | 1.038037   | -1.505669 | 1.463962  |
| 76 | 7  | 5.261606   | -1.151051 | 2.070923  |
| 77 | 1  | 5.226800   | -0.212464 | 1.677442  |
| 78 | 7  | 7.763461   | -2.336939 | -0.138366 |
| 79 | 1  | 7.801625   | -3.219021 | 0.368496  |
| 80 | 7  | 12.180614  | -1.792024 | 0.309634  |
| 81 | 6  | 0.680216   | -2.796242 | 1.532208  |
| 82 | 1  | -0.258352  | -3.076488 | 1.050720  |
| 83 | 6  | 1.462647   | -3.750587 | 2.167474  |
| 84 | 1  | 1.132639   | -4.789005 | 2.202441  |
| 85 | 6  | 2.678299   | -3.362357 | 2.728572  |
| 86 | 1  | 3.335396   | -4.097573 | 3.196970  |
| 87 | 6  | 3.057997   | -2.021514 | 2.668320  |
| 88 | 6  | 2.187244   | -1.134351 | 2.035993  |
| 89 | 1  | 2.457415   | -0.077660 | 1.973809  |
| 90 | 6  | 4.396584   | -1.519140 | 3.164091  |
| 91 | 1  | 4.892573   | -2.303074 | 3.750929  |
| 92 | 1  | 4.258875   | -0.645402 | 3.815248  |
| 93 | 6  | 6.021683   | -2.073243 | 1.453442  |
| 94 | 6  | 6.820038   | -1.497714 | 0.272498  |
| 95 | 6  | 8.730475   | -2.074956 | -1.192031 |
| 96 | 1  | 8.449770   | -2.646675 | -2.091193 |

|     |   |           |           |           |
|-----|---|-----------|-----------|-----------|
| 97  | 1 | 8.651750  | -1.009915 | -1.442542 |
| 98  | 6 | 10.130840 | -2.435683 | -0.769005 |
| 99  | 6 | 10.954320 | -1.508706 | -0.114499 |
| 100 | 1 | 10.613631 | -0.479395 | 0.057340  |
| 101 | 6 | 12.654008 | -3.017019 | 0.100981  |
| 102 | 1 | 13.666805 | -3.218055 | 0.464366  |
| 103 | 6 | 11.930429 | -4.015697 | -0.550478 |
| 104 | 1 | 12.367480 | -5.001771 | -0.711480 |
| 105 | 6 | 10.646608 | -3.714932 | -0.992178 |
| 106 | 1 | 10.053050 | -4.469096 | -1.516118 |
| 107 | 8 | 5.187772  | 4.518919  | -0.278389 |
| 108 | 8 | 4.199194  | 1.525428  | 1.243096  |
| 109 | 7 | 10.164545 | 2.093693  | -0.152218 |
| 110 | 7 | 5.929454  | 2.409111  | -0.759381 |
| 111 | 1 | 5.966859  | 1.441988  | -0.425629 |
| 112 | 7 | 3.832262  | 3.710152  | 1.796624  |
| 113 | 1 | 4.076251  | 4.641995  | 1.453477  |
| 114 | 7 | 0.090077  | 1.710456  | 1.641977  |
| 115 | 6 | 10.867109 | 3.178752  | -0.471543 |
| 116 | 1 | 11.903373 | 3.210802  | -0.122579 |
| 117 | 6 | 10.335675 | 4.234399  | -1.211297 |
| 118 | 1 | 10.946513 | 5.107889  | -1.441844 |
| 119 | 6 | 9.015884  | 4.147002  | -1.646561 |
| 120 | 1 | 8.570339  | 4.956651  | -2.229243 |
| 121 | 6 | 8.272677  | 3.010078  | -1.327939 |
| 122 | 6 | 8.906541  | 2.021451  | -0.568315 |
| 123 | 1 | 8.352210  | 1.120051  | -0.287816 |
| 124 | 6 | 6.852058  | 2.815152  | -1.806862 |
| 125 | 1 | 6.472713  | 3.749466  | -2.239051 |
| 126 | 1 | 6.823636  | 2.044580  | -2.591833 |
| 127 | 6 | 5.229356  | 3.317006  | -0.074931 |
| 128 | 6 | 4.377301  | 2.736997  | 1.068677  |
| 129 | 6 | 3.088963  | 3.539172  | 3.022849  |
| 130 | 1 | 3.107700  | 4.493429  | 3.564418  |
| 131 | 1 | 3.621921  | 2.810509  | 3.656927  |
| 132 | 6 | 1.662926  | 3.059030  | 2.867779  |
| 133 | 6 | 1.281052  | 2.303583  | 1.763617  |
| 134 | 1 | 1.975955  | 2.137619  | 0.946101  |
| 135 | 6 | -0.824944 | 1.902696  | 2.598127  |
| 136 | 1 | -1.790061 | 1.411965  | 2.458909  |
| 137 | 6 | -0.562446 | 2.689782  | 3.714666  |
| 138 | 1 | -1.335530 | 2.842208  | 4.467944  |
| 139 | 6 | 0.700959  | 3.257292  | 3.861958  |
| 140 | 1 | 0.932965  | 3.850135  | 4.749802  |
| 141 | 8 | 2.329711  | 0.585061  | -0.735832 |
| 142 | 1 | 2.559285  | 1.056244  | -1.545355 |
| 143 | 1 | 3.109627  | 0.686643  | -0.153259 |

---

**Table S7.** Summary of natural population analysis (|e|) at the optimized geometry (mPW1PW/def2SVP) for L.

| Atom | No | Natural Charge | Natural Population |         |         |         |
|------|----|----------------|--------------------|---------|---------|---------|
|      |    |                | Core               | Valence | Rydberg | Total   |
| C    | 1  | 0.05670        | 1.99897            | 3.91940 | 0.02494 | 5.94330 |
| C    | 2  | -0.10434       | 1.99886            | 4.08981 | 0.01567 | 6.10434 |
| C    | 3  | -0.18150       | 1.99889            | 4.16625 | 0.01636 | 6.18150 |
| C    | 4  | -0.26281       | 1.99896            | 4.24988 | 0.01397 | 6.26281 |
| C    | 5  | 0.05530        | 1.99906            | 3.92137 | 0.02426 | 5.94470 |
| H    | 6  | 0.20474        | 0.00000            | 0.79253 | 0.00273 | 0.79526 |
| H    | 7  | 0.24920        | 0.00000            | 0.74684 | 0.00396 | 0.75080 |
| H    | 8  | 0.23469        | 0.00000            | 0.76243 | 0.00288 | 0.76531 |
| H    | 9  | 0.20944        | 0.00000            | 0.78781 | 0.00275 | 0.79056 |
| N    | 10 | -0.48260       | 1.99930            | 5.46561 | 0.01769 | 7.48260 |
| C    | 11 | -0.23942       | 1.99907            | 4.21958 | 0.02077 | 6.23942 |
| H    | 12 | 0.26802        | 0.00000            | 0.72769 | 0.00429 | 0.73198 |
| H    | 13 | 0.22638        | 0.00000            | 0.77056 | 0.00306 | 0.77362 |
| N    | 14 | -0.64091       | 1.99918            | 5.62912 | 0.01261 | 7.64091 |
| H    | 15 | 0.41222        | 0.00000            | 0.58004 | 0.00774 | 0.58778 |
| C    | 16 | 0.64697        | 1.99919            | 3.30748 | 0.04636 | 5.35303 |
| N    | 17 | -0.65110       | 1.99918            | 5.64035 | 0.01158 | 7.65110 |
| H    | 18 | 0.43814        | 0.00000            | 0.55503 | 0.00683 | 0.56186 |
| C    | 19 | -0.23625       | 1.99911            | 4.21585 | 0.02130 | 6.23625 |
| H    | 20 | 0.26099        | 0.00000            | 0.73351 | 0.00550 | 0.73901 |
| H    | 21 | 0.22557        | 0.00000            | 0.77141 | 0.00302 | 0.77443 |
| C    | 22 | -0.10086       | 1.99888            | 4.08636 | 0.01562 | 6.10086 |
| C    | 23 | 0.06310        | 1.99898            | 3.91357 | 0.02435 | 5.93690 |
| C    | 24 | -0.19337       | 1.99890            | 4.17920 | 0.01527 | 6.19337 |
| H    | 25 | 0.21292        | 0.00000            | 0.78416 | 0.00292 | 0.78708 |
| C    | 26 | -0.26050       | 1.99896            | 4.24739 | 0.01415 | 6.26050 |
| H    | 27 | 0.23129        | 0.00000            | 0.76584 | 0.00286 | 0.76871 |
| C    | 28 | 0.05192        | 1.99905            | 3.92480 | 0.02422 | 5.94808 |
| H    | 29 | 0.23585        | 0.00000            | 0.76128 | 0.00287 | 0.76415 |
| H    | 30 | 0.21099        | 0.00000            | 0.78628 | 0.00273 | 0.78901 |
| N    | 31 | -0.47771       | 1.99930            | 5.46069 | 0.01772 | 7.47771 |
| C    | 32 | 0.64157        | 1.99920            | 3.31228 | 0.04695 | 5.35843 |
| O    | 33 | -0.65768       | 1.99973            | 6.64740 | 0.01054 | 8.65768 |
| O    | 34 | -0.64698       | 1.99974            | 6.63685 | 0.01039 | 8.64698 |

**Table S8.** Summary of natural population analysis (|e|) at the optimized geometry (mPW1PW/def2SVP) for the model cation [Cd(L)<sub>4</sub>(OH<sub>2</sub>)<sub>2</sub>]<sup>2+</sup>.

| Atom | No | Natural Charge | Natural Population |         |         |         |
|------|----|----------------|--------------------|---------|---------|---------|
|      |    |                | Core               | Valence | Rydberg | Total   |
| O    | 1  | -0.63849       | 1.99974            | 6.62841 | 0.01034 | 8.63849 |
| O    | 2  | -0.74030       | 1.99970            | 6.73120 | 0.00939 | 8.74030 |
| N    | 3  | -0.49126       | 1.99930            | 5.47353 | 0.01843 | 7.49126 |
| N    | 4  | -0.65328       | 1.99916            | 5.64243 | 0.01169 | 7.65328 |
| H    | 5  | 0.45591        | 0.00000            | 0.53734 | 0.00674 | 0.54409 |
| N    | 6  | -0.62838       | 1.99915            | 5.61850 | 0.01073 | 7.62838 |
| H    | 7  | 0.45647        | 0.00000            | 0.53666 | 0.00687 | 0.54353 |
| N    | 8  | -0.59856       | 1.99931            | 5.57783 | 0.02142 | 7.59856 |
| C    | 9  | 0.06663        | 1.99905            | 3.91010 | 0.02421 | 5.93337 |
| H    | 10 | 0.22391        | 0.00000            | 0.77352 | 0.00256 | 0.77609 |
| C    | 11 | -0.25158       | 1.99896            | 4.23846 | 0.01416 | 6.25158 |
| H    | 12 | 0.24612        | 0.00000            | 0.75116 | 0.00272 | 0.75388 |
| C    | 13 | -0.18333       | 1.99890            | 4.16905 | 0.01538 | 6.18333 |
| H    | 14 | 0.23852        | 0.00000            | 0.75878 | 0.00270 | 0.76148 |
| C    | 15 | -0.11176       | 1.99886            | 4.09755 | 0.01535 | 6.11176 |
| C    | 16 | 0.05349        | 1.99896            | 3.92262 | 0.02493 | 5.94651 |
| H    | 17 | 0.20752        | 0.00000            | 0.78812 | 0.00436 | 0.79248 |
| C    | 18 | -0.23552       | 1.99910            | 4.21487 | 0.02154 | 6.23552 |
| H    | 19 | 0.25007        | 0.00000            | 0.74569 | 0.00424 | 0.74993 |
| H    | 20 | 0.24185        | 0.00000            | 0.75513 | 0.00302 | 0.75815 |
| C    | 21 | 0.62938        | 1.99915            | 3.32481 | 0.04667 | 5.37062 |
| C    | 22 | 0.66723        | 1.99915            | 3.28722 | 0.04640 | 5.33277 |
| C    | 23 | -0.24016       | 1.99911            | 4.21967 | 0.02138 | 6.24016 |
| H    | 24 | 0.26108        | 0.00000            | 0.73652 | 0.00240 | 0.73892 |
| H    | 25 | 0.25644        | 0.00000            | 0.73948 | 0.00408 | 0.74356 |
| C    | 26 | -0.07183       | 1.99885            | 4.05771 | 0.01526 | 6.07183 |
| C    | 27 | 0.06127        | 1.99893            | 3.91479 | 0.02502 | 5.93873 |
| H    | 28 | 0.22042        | 0.00000            | 0.77396 | 0.00562 | 0.77958 |
| C    | 29 | 0.07636        | 1.99901            | 3.90079 | 0.02384 | 5.92364 |
| H    | 30 | 0.22666        | 0.00000            | 0.76888 | 0.00446 | 0.77334 |
| C    | 31 | -0.23414       | 1.99897            | 4.22087 | 0.01430 | 6.23414 |
| H    | 32 | 0.26067        | 0.00000            | 0.73689 | 0.00244 | 0.73933 |
| C    | 33 | -0.15300       | 1.99890            | 4.13863 | 0.01547 | 6.15300 |
| H    | 34 | 0.25550        | 0.00000            | 0.74196 | 0.00254 | 0.74450 |
| O    | 35 | -0.63612       | 1.99974            | 6.62608 | 0.01030 | 8.63612 |
| O    | 36 | -0.72132       | 1.99970            | 6.71170 | 0.00993 | 8.72132 |
| N    | 37 | -0.61222       | 1.99931            | 5.59094 | 0.02197 | 7.61222 |
| N    | 38 | -0.66611       | 1.99916            | 5.65543 | 0.01151 | 7.66611 |
| H    | 39 | 0.44617        | 0.00000            | 0.54715 | 0.00668 | 0.55383 |
| N    | 40 | -0.61234       | 1.99915            | 5.60163 | 0.01156 | 7.61234 |
| H    | 41 | 0.43907        | 0.00000            | 0.55447 | 0.00646 | 0.56093 |
| N    | 42 | -0.47089       | 1.99930            | 5.45398 | 0.01761 | 7.47089 |
| C    | 43 | 0.06795        | 1.99901            | 3.91017 | 0.02287 | 5.93205 |
| H    | 44 | 0.21523        | 0.00000            | 0.78081 | 0.00396 | 0.78477 |
| C    | 45 | -0.23610       | 1.99896            | 4.22279 | 0.01435 | 6.23610 |
| H    | 46 | 0.25903        | 0.00000            | 0.73851 | 0.00245 | 0.74097 |
| C    | 47 | -0.13997       | 1.99889            | 4.12472 | 0.01636 | 6.13997 |
| H    | 48 | 0.26378        | 0.00000            | 0.73340 | 0.00281 | 0.73622 |
| C    | 49 | -0.06673       | 1.99886            | 4.05176 | 0.01611 | 6.06673 |
| C    | 50 | 0.08408        | 1.99891            | 3.89314 | 0.02387 | 5.91592 |
| H    | 51 | 0.21782        | 0.00000            | 0.77736 | 0.00483 | 0.78218 |
| C    | 52 | -0.24121       | 1.99911            | 4.21836 | 0.02374 | 6.24121 |
| H    | 53 | 0.25982        | 0.00000            | 0.73587 | 0.00431 | 0.74018 |
| H    | 54 | 0.24413        | 0.00000            | 0.75295 | 0.00292 | 0.75587 |
| C    | 55 | 0.64435        | 1.99919            | 3.30874 | 0.04771 | 5.35565 |
| C    | 56 | 0.66141        | 1.99915            | 3.29491 | 0.04453 | 5.33859 |
| C    | 57 | -0.23468       | 1.99909            | 4.21333 | 0.02227 | 6.23468 |
| H    | 58 | 0.23317        | 0.00000            | 0.76375 | 0.00308 | 0.76683 |
| H    | 59 | 0.24727        | 0.00000            | 0.74803 | 0.00470 | 0.75273 |
| C    | 60 | -0.12639       | 1.99886            | 4.11208 | 0.01545 | 6.12639 |
| C    | 61 | 0.07297        | 1.99895            | 3.90232 | 0.02576 | 5.92703 |
| H    | 62 | 0.22485        | 0.00000            | 0.77008 | 0.00507 | 0.77515 |
| C    | 63 | 0.06846        | 1.99906            | 3.90850 | 0.02399 | 5.93154 |
| H    | 64 | 0.21964        | 0.00000            | 0.77767 | 0.00270 | 0.78036 |
| C    | 65 | -0.25632       | 1.99896            | 4.24301 | 0.01435 | 6.25632 |
| H    | 66 | 0.24340        | 0.00000            | 0.75380 | 0.00280 | 0.75660 |
| C    | 67 | -0.19599       | 1.99890            | 4.18145 | 0.01564 | 6.19599 |

|    |     |          |          |          |         |          |
|----|-----|----------|----------|----------|---------|----------|
| H  | 68  | 0.23110  | 0.00000  | 0.76610  | 0.00280 | 0.76890  |
| Cd | 69  | 1.36204  | 35.99815 | 10.62743 | 0.01239 | 46.63796 |
| O  | 70  | -0.63612 | 1.99974  | 6.62608  | 0.01030 | 8.63612  |
| O  | 71  | -0.72132 | 1.99970  | 6.71170  | 0.00993 | 8.72132  |
| O  | 72  | -0.95045 | 1.99980  | 6.93987  | 0.01079 | 8.95045  |
| H  | 73  | 0.49761  | 0.00000  | 0.49638  | 0.00601 | 0.50239  |
| H  | 74  | 0.52060  | 0.00000  | 0.47232  | 0.00709 | 0.47940  |
| N  | 75  | -0.61222 | 1.99931  | 5.59094  | 0.02197 | 7.61222  |
| N  | 76  | -0.66611 | 1.99916  | 5.65543  | 0.01151 | 7.66611  |
| H  | 77  | 0.44617  | 0.00000  | 0.54715  | 0.00668 | 0.55383  |
| N  | 78  | -0.61234 | 1.99915  | 5.60163  | 0.01156 | 7.61234  |
| H  | 79  | 0.43907  | 0.00000  | 0.55447  | 0.00646 | 0.56093  |
| N  | 80  | -0.47089 | 1.99930  | 5.45398  | 0.01761 | 7.47089  |
| C  | 81  | 0.06795  | 1.99901  | 3.91017  | 0.02287 | 5.93205  |
| H  | 82  | 0.21523  | 0.00000  | 0.78081  | 0.00396 | 0.78477  |
| C  | 83  | -0.23610 | 1.99896  | 4.22279  | 0.01435 | 6.23610  |
| H  | 84  | 0.25903  | 0.00000  | 0.73851  | 0.00245 | 0.74097  |
| C  | 85  | -0.13997 | 1.99889  | 4.12472  | 0.01636 | 6.13997  |
| H  | 86  | 0.26378  | 0.00000  | 0.73340  | 0.00281 | 0.73622  |
| C  | 87  | -0.06673 | 1.99886  | 4.05177  | 0.01611 | 6.06673  |
| C  | 88  | 0.08408  | 1.99891  | 3.89314  | 0.02387 | 5.91592  |
| H  | 89  | 0.21782  | 0.00000  | 0.77736  | 0.00483 | 0.78218  |
| C  | 90  | -0.24121 | 1.99911  | 4.21836  | 0.02374 | 6.24121  |
| H  | 91  | 0.25982  | 0.00000  | 0.73587  | 0.00431 | 0.74018  |
| H  | 92  | 0.24413  | 0.00000  | 0.75295  | 0.00292 | 0.75587  |
| C  | 93  | 0.64435  | 1.99919  | 3.30874  | 0.04771 | 5.35565  |
| C  | 94  | 0.66141  | 1.99915  | 3.29491  | 0.04453 | 5.33859  |
| C  | 95  | -0.23468 | 1.99909  | 4.21333  | 0.02227 | 6.23468  |
| H  | 96  | 0.23317  | 0.00000  | 0.76375  | 0.00308 | 0.76683  |
| H  | 97  | 0.24726  | 0.00000  | 0.74804  | 0.00470 | 0.75274  |
| C  | 98  | -0.12639 | 1.99886  | 4.11208  | 0.01545 | 6.12639  |
| C  | 99  | 0.07297  | 1.99895  | 3.90231  | 0.02576 | 5.92703  |
| H  | 100 | 0.22485  | 0.00000  | 0.77008  | 0.00507 | 0.77515  |
| C  | 101 | 0.06846  | 1.99906  | 3.90850  | 0.02399 | 5.93154  |
| H  | 102 | 0.21964  | 0.00000  | 0.77767  | 0.00270 | 0.78036  |
| C  | 103 | -0.25632 | 1.99896  | 4.24301  | 0.01435 | 6.25632  |
| H  | 104 | 0.24340  | 0.00000  | 0.75380  | 0.00280 | 0.75660  |
| C  | 105 | -0.19599 | 1.99890  | 4.18145  | 0.01564 | 6.19599  |
| H  | 106 | 0.23110  | 0.00000  | 0.76610  | 0.00280 | 0.76890  |
| O  | 107 | -0.63849 | 1.99974  | 6.62841  | 0.01034 | 8.63849  |
| O  | 108 | -0.74030 | 1.99970  | 6.73120  | 0.00939 | 8.74030  |
| N  | 109 | -0.49126 | 1.99930  | 5.47353  | 0.01843 | 7.49126  |
| N  | 110 | -0.65328 | 1.99916  | 5.64243  | 0.01169 | 7.65328  |
| H  | 111 | 0.45591  | 0.00000  | 0.53734  | 0.00674 | 0.54409  |
| N  | 112 | -0.62838 | 1.99915  | 5.61850  | 0.01073 | 7.62838  |
| H  | 113 | 0.45647  | 0.00000  | 0.53666  | 0.00687 | 0.54353  |
| N  | 114 | -0.59856 | 1.99931  | 5.57783  | 0.02142 | 7.59856  |
| C  | 115 | 0.06664  | 1.99905  | 3.91010  | 0.02421 | 5.93336  |
| H  | 116 | 0.22392  | 0.00000  | 0.77352  | 0.00256 | 0.77608  |
| C  | 117 | -0.25158 | 1.99896  | 4.23846  | 0.01416 | 6.25158  |
| H  | 118 | 0.24612  | 0.00000  | 0.75116  | 0.00272 | 0.75388  |
| C  | 119 | -0.18333 | 1.99890  | 4.16905  | 0.01538 | 6.18333  |
| H  | 120 | 0.23852  | 0.00000  | 0.75878  | 0.00270 | 0.76148  |
| C  | 121 | -0.11177 | 1.99886  | 4.09755  | 0.01535 | 6.11177  |
| C  | 122 | 0.05350  | 1.99896  | 3.92261  | 0.02493 | 5.94650  |
| H  | 123 | 0.20752  | 0.00000  | 0.78813  | 0.00436 | 0.79248  |
| C  | 124 | -0.23552 | 1.99910  | 4.21487  | 0.02154 | 6.23552  |
| H  | 125 | 0.25007  | 0.00000  | 0.74569  | 0.00424 | 0.74993  |
| H  | 126 | 0.24185  | 0.00000  | 0.75513  | 0.00302 | 0.75815  |
| C  | 127 | 0.62937  | 1.99915  | 3.32481  | 0.04667 | 5.37063  |
| C  | 128 | 0.66723  | 1.99915  | 3.28722  | 0.04640 | 5.33277  |
| C  | 129 | -0.24015 | 1.99911  | 4.21967  | 0.02138 | 6.24015  |
| H  | 130 | 0.26108  | 0.00000  | 0.73652  | 0.00240 | 0.73892  |
| H  | 131 | 0.25644  | 0.00000  | 0.73948  | 0.00408 | 0.74356  |
| C  | 132 | -0.07183 | 1.99885  | 4.05771  | 0.01526 | 6.07183  |
| C  | 133 | 0.06127  | 1.99893  | 3.91479  | 0.02502 | 5.93873  |
| H  | 134 | 0.22042  | 0.00000  | 0.77396  | 0.00562 | 0.77958  |
| C  | 135 | 0.07636  | 1.99901  | 3.90079  | 0.02384 | 5.92364  |
| H  | 136 | 0.22666  | 0.00000  | 0.76888  | 0.00446 | 0.77334  |
| C  | 137 | -0.23414 | 1.99897  | 4.22087  | 0.01430 | 6.23414  |
| H  | 138 | 0.26067  | 0.00000  | 0.73689  | 0.00244 | 0.73933  |
| C  | 139 | -0.15300 | 1.99890  | 4.13863  | 0.01547 | 6.15300  |
| H  | 140 | 0.25550  | 0.00000  | 0.74196  | 0.00254 | 0.74450  |
| O  | 141 | -0.95045 | 1.99980  | 6.93987  | 0.01079 | 8.95045  |
| H  | 142 | 0.49761  | 0.00000  | 0.49638  | 0.00601 | 0.50239  |
| H  | 143 | 0.52059  | 0.00000  | 0.47232  | 0.00709 | 0.47941  |
